# Supplementary material for: Glycol Chitosan-Docosahexaenoic Acid Liposomes for Drug Delivery: Synergistic Effect of Doxorubicin-Rapamycin in Drug-Resistant Breast Cancer
Source: PubMed Central journal article supplement (PMC6835303; doi:10.3390/md17100581), 2019-10-12
Supplement: marinedrugs-17-00581-s001.pdf [file marinedrugs-17-00581-s001.pdf]

*Article*

# **Glycol chitosan-docosaehaenoic acid liposomes for drug delivery: synergistic effect of doxorubicin-rapamycin in drug-resistant breast cancer**

Min Woo Kim <sup>1</sup>, Takuro Niidome <sup>2</sup>, and Ruda Lee <sup>1\*</sup>

<sup>1</sup> International Research Organization for Advance Science and Technology (IROAST), Kumamoto University, Kumamoto, Japan; minwoo-kim@kumamoto-u.ac.jp

<sup>2</sup> Faculty of Advanced Science and Technology, Kumamoto University, Kumamoto, Japan; niidome@kumamoto-u.ac.jp

\* Correspondence: aeju-lee@kumamoto-u.ac.jp

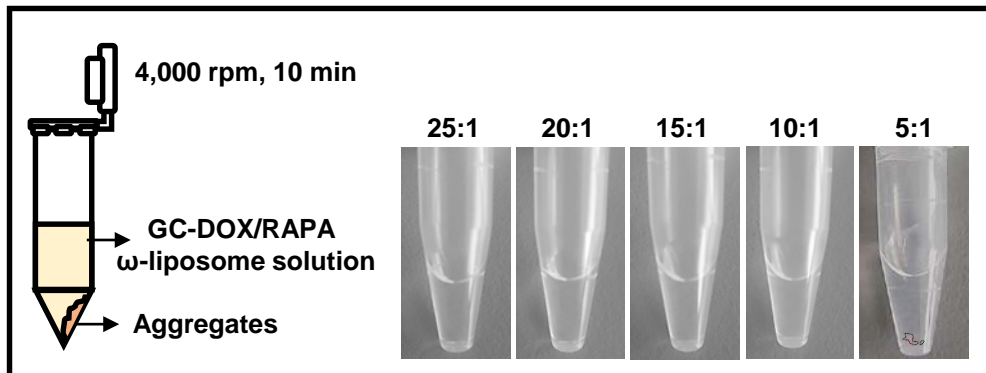

Figure S1. The images of GC-DOX/RAPA  $\omega$ -liposome sample at different ratios after centrifugation. Precipitate (dotted line) stands for the aggregated GC-DOX/RAPA  $\omega$ -liposomes in a tube after centrifugation. Supernatant is the remaining GC-DOX/RAPA  $\omega$ -liposome solution.

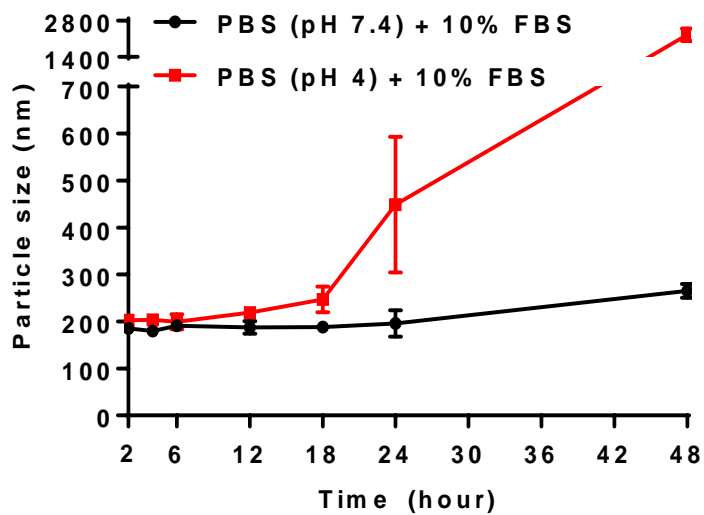

Figure S2. Colloidal stability of GC-DOX/RAPA  $\omega$ -liposomes at pH 7.4 and pH 4 in 10% FBS. Particle size was monitored with dynamic light scattering over 48 hours (n = 3/time point).

| Formulations                            | IC <sub>50</sub> RAPA (nM) | IC <sub>50</sub> DOX (nM) | Combination Index (CI) |
|-----------------------------------------|----------------------------|---------------------------|------------------------|
| RAPA $\omega$ -liposomes                | 74.12                      | N/A                       | N/A                    |
| GC-DOX                                  | N/A                        | 856.10                    | N/A                    |
| GC-DOX/RAPA $\omega$ -liposomes (1:1.5) | 12.24                      | 8.16                      | 0.18                   |

CI<1 Synergy

CI=1 Additive

CI>1 Antagonism

$$\text{Combination Index (CI)} = \frac{C_A}{IC_{50A}} + \frac{C_B}{IC_{50B}}$$

Figure S3. Drug combination index analysis for selected DOX and RAPA ratio (1:1.5) in MDA-MB-231-GFP/DOX cell lines. For drug combination testing, the cells were exposed to the indicated drugs for 72 h, and the IC<sub>50</sub> and combination index (CI) was calculated according to the equation.

Table S1. Components of GC-DOX/RAPA  $\omega$ -liposomes

| Formulations                    | Lipid composition (2 mg/mL) |           |        | Drug composition |            | E.E.   |        | L.E.  |       |
|---------------------------------|-----------------------------|-----------|--------|------------------|------------|--------|--------|-------|-------|
|                                 | DPPC                        | CHEMS     | DHA    | RAPA             | DOX        | RAPA   | DOX    | RAPA  | DOX   |
| RAPA $\omega$ -liposomes        | 47.5 mol%                   | 47.5 mol% | 5 mol% | 10:1 (w/w)       | -          | 69.88% | -      | 6.27% | -     |
| GC-DOX/RAPA $\omega$ -liposomes | 47.5 mol%                   | 47.5 mol% | 5 mol% | 10:1 (w/w)       | 20:1 (w/w) | 69.88% | 90.29% | 6.27% | 4.05% |
